## Clinical update

# Clinical diabetic cardiomyopathy: a two-faced disease with restrictive and dilated phenotypes

Petar M. Seferović<sup>1</sup> and Walter J. Paulus<sup>2\*</sup>

<sup>1</sup>University Medical Center, Belgrade, Serbia; and <sup>2</sup>Institute for Cardiovascular Research VU (ICaR-VU), VU University Medical Center, Van der Boechorststraat 7, 1081 BT Amsterdam, The Netherlands

Received 28 October 2014; revised 1 April 2015; accepted 2 April 2015; online publish-ahead-of-print 17 April 2015

Diabetes mellitus-related cardiomyopathy (DMCMP) was originally described as a dilated phenotype with eccentric left ventricular (LV) remodelling and systolic LV dysfunction. Recently however, clinical studies on DMCMP mainly describe a restrictive phenotype with concentric LV remodelling and diastolic LV dysfunction. Both phenotypes are not successive stages of DMCMP but evolve independently to respectively heart failure with preserved left ventricular ejection fraction (HFPEF) or reduced left ventricular ejection fraction (HFREF). Phenotype-specific pathophysiological mechanisms were recently proposed for LV remodelling and dysfunction in HFPEF and HFREF consisting of coronary microvascular endothelial dysfunction in HFPEF and cardiomyocyte cell death in HFREF. A similar preferential involvement of endothelial or cardiomyocyte cell compartments explains DMCMP development into distinct restrictive/HFPEF or dilated/HFREF phenotypes. Diabetes mellitus (DM)-related metabolic derangements such as hyperglycaemia, lipotoxicity, and hyperinsulinaemia favour development of DMCMP with restrictive/HFPEF phenotype, which is more prevalent in obese type 2 DM patients. In contrast, autoimmunity predisposes to a dilated/HFREF phenotype, which manifests itself more in autoimmune-prone type 1 DM patients. Finally, coronary microvascular rarefaction and advanced glycation end-products deposition are relevant to both phenotypes. Diagnosis of DMCMP requires impaired glucose metabolism and exclusion of coronary, valvular, hypertensive, or congenital heart disease and of viral, toxic, familial, or infiltrative cardiomyopathy. In addition, diagnosis of DMCMP with restrictive/HFPEF phenotype requires normal systolic LV function and diastolic LV dysfunction, whereas diagnosis of DMCMP with dilated/HFREF phenotype requires systolic LV dysfunction. Treatment of DMCMP with restrictive/HFPEF phenotype is limited to diuretics and lifestyle modification, whereas DMCMP with dilated/HFREF phenotype is treated in accordance to HF guidelines.

**Keywords** Diabetic cardiomyopathy • Diabetes mellitus • Heart failure • Left ventricular Remodelling • Diastolic dysfunction

## Introduction

### Clinical presentation of two phenotypes

The concept of diabetes mellitus (DM) directly causing myocardial dysfunction dates back from 1954, when Lundbæk observed myocardial dysfunction to be a common DM-related complication present in two-thirds of elderly DM patients.<sup>1</sup> He subsequently became the first to suggest the diagnosis of a specific Diabetes mellitus-related cardiomyopathy (DMCMP).<sup>2</sup> Almost 20 years later, Rubler *et al.* provided further evidence that cardiomyopathic dysfunction could indeed directly result from DM and not merely indirectly from concomitant coronary artery disease.<sup>3</sup> This landmark study reported on post-mortem findings of four patients with diabetes related nephropathy and heart failure (HF) unrelated to valvular, congenital or hypertensive heart disease, alcoholism or

significant epicardial coronary artery atherosclerosis. The study proposed that they suffered from a novel DMCMP caused by myocardial microangiopathy or disturbed myocardial metabolism. The use of the term cardiomyopathy to indicate this condition corresponds to the currently used definition of cardiomyopathy:<sup>4</sup> 'A cardiomyopathy is defined as a heart muscle disease in which the myocardium is structurally and functionally abnormal in the absence of coronary artery disease as well as hypertensive, valvular, or congenital heart disorders'. In the patients described by Rubler *et al.*, DM had lasted for 5–20 years and the patients presented clinically with cardiomegaly, pulmonary congestion, and gallop sounds. On pathological examination, there was myocardial hypertrophy, fibrosis, and microvascular wall thickening because of accumulation of acid mucopolysaccharides. Based on presentation and pathological findings, the clinical phenotype of this DMCMP corresponded with a dilated cardiomyopathy similar to dilated

\* Corresponding author. Tel: +31 20 4448110, Fax: +31 20 4448255, Email: [wj.paulus@vumc.nl](mailto:wj.paulus@vumc.nl)

Published on behalf of the European Society of Cardiology. All rights reserved. © The Author 2015. For permissions please email: [journals.permissions@oup.com](mailto:journals.permissions@oup.com).

cardiomyopathy induced by toxic agents or viral myocarditis. When becoming symptomatic, DMCMP patients with a dilated phenotype present as heart failure with reduced ejection fraction (HFREF).

Recently, however, most clinical reports on DMCMP present a phenotype which differs from a dilated cardiomyopathy.<sup>5,6</sup> The typical patient suffering of DMCMP is now described as an elderly woman suffering from obesity and type 2 DM (T2DM) with a small left ventricular (LV) cavity, normal LV ejection fraction, thick LV walls, elevated LV filling pressures, and a large left atrium. This description fits a restrictive but not a dilated cardiomyopathy. The current shift in appreciation of DMCMP from a dilated to a restrictive phenotype is matched by a rising awareness that many HF patients present with a normal-sized left ventricle and a normal left ventricular ejection fraction (LVEF).<sup>7–9</sup> These patients are currently labelled as suffering from heart failure with preserved left ventricular ejection fraction (HFPEF).<sup>10</sup> When becoming symptomatic, DMCMP patients with a restrictive phenotype present as HFPEF.

### Successive stages or distinct phenotypes?

Diabetes mellitus-related cardiomyopathy with restrictive/HFPEF phenotype has been described in two reviews<sup>11,12</sup> and in both reports it is considered to be a precursor stage of DMCMP with dilated/HFREF phenotype. In an HFPEF patient population, the incidence of HFPEF progressing to HFREF is however limited and related to intervening myocardial infarctions or very old age (>80 years) but not to DM.<sup>13</sup> Normal cardiac remodelling over the adult life course is characterized by decreasing LV dimensions and increasing fractional shortening. Diabetes mellitus attenuates but does not reverse this LV remodelling pattern.<sup>14</sup> Furthermore, in arterial hypertension, another condition frequently associated with HFPEF, the progression from an asymptomatic stage to HFPEF is characterized by LV shrinkage but not LV dilatation.<sup>15</sup> Based on the foregoing arguments, an evolution from DMCMP with restrictive/HFPEF phenotype to DMCMP with dilated/HFREF phenotype seems unlikely and DMCMP therefore evolves as two distinct phenotypes.

Such an evolution implies existence of phenotype-specific mechanisms that drive the cardiac remodelling process into a restrictive or a dilated DMCMP phenotype. Recently, phenotype-specific mechanisms have been proposed for LV remodelling in HFPEF and HFREF. In HFPEF concentric LV remodelling results from coronary microvascular endothelial inflammation with cardiomyocytes only exposed to altered paracrine endothelial signalling, whereas in HFREF eccentric LV remodelling results from cardiomyocyte cell death because of ischaemia, viral infection, or toxic agents.<sup>16</sup> A similar selective involvement of endothelial or cardiomyocyte cell compartments could explain DMCMP development into distinct restrictive/HFPEF or dilated/HFREF phenotypes.

### Clinical implications of two phenotypes

The distinction between dilated and restrictive phenotypes of DMCMP is of therapeutic importance because when symptomatic, a dilated phenotype will present as HFREF, whereas a restrictive phenotype will present as HFPEF. For numerous HF drugs, the outcome of large trials differed in HFREF and HFPEF being positive in HFREF and neutral in HFPEF.<sup>17</sup> The therapeutic strategy therefore differs in both DMCMP phenotypes with angiotensin-converting enzyme inhibitors,  $\beta$ -blockers, angiotensin II receptor blockers,

and mineralocorticoid-receptor antagonists clearly indicated for DMCMP with dilated/HFREF phenotype and of uncertain value for DMCMP with restrictive/HFPEF phenotype.

## Epidemiology

The existence of a dilated/HFREF phenotype of DMCMP was confirmed in the United States by nation-wide hospital discharge data showing an independent association between DM and non-*ischaemic* dilated cardiomyopathy whereby DM significantly increases the odds for dilated cardiomyopathy (odds ratio: 1.75; 95% CI: 1.71–1.79).<sup>18</sup> Diabetes mellitus-related cardiomyopathy patients with a dilated/HFREF phenotype were also shown to have worse haemodynamic features than other dilated cardiomyopathy patients evident from a lower LVEF and a higher myocardial stiffness modulus.<sup>19</sup> Specific epidemiological and clinical features of the restrictive/HFPEF phenotype of DMCMP were recently reported in an RELAX ancillary study.<sup>20</sup> Apart from a worse clinical presentation with more frequent hospitalizations and less exercise capacity, they had more LV hypertrophy and higher LV stiffness. These two haemodynamic features had previously also been reported in an invasive study on DMCMP patients with restrictive/HFPEF phenotype and attributed to microvascular advanced glycation end-products (AGEs) deposition and stiff cardiomyocytes.<sup>19</sup>

Mortality and hospitalization rates are particularly high in HF patients suffering of DM<sup>21–25</sup> and as demonstrated by Mc Donald *et al.*, DM is associated with a greater risk of death or HF hospitalization in both HFPEF and HFREF.<sup>26</sup> The latter study is especially relevant to the presence of two DMCMP phenotypes as it demonstrated the additional risk to differ between dilated/HFREF and restrictive/HFPEF phenotypes with the largest DM-related additional risk counterintuitively observed in the restrictive/HFPEF phenotype. At present, it remains unclear if the DM-related excess mortality and hospitalizations relate to larger *ischaemic* myocardial dysfunction or to direct DM-related myocardial dysfunction.

The relation between DM and HF is bidirectional: the outcome of HF patients is worse in the presence of DM and DM patients are at higher risk for HF.<sup>27</sup> Not only the presence of DM but also the extent of glycaemic control is associated with HF risk.<sup>28</sup> For each 1% increase in glycosylated haemoglobin (HbA<sub>1c</sub>), there is a 8% risk increment for HF. Because of the close epidemiological interrelation between HF and DM, HF can no longer be ignored as a cardiovascular outcome measure for new glucose-lowering drugs.<sup>29</sup>

## Pathophysiology

Myocardial structure and function differ between DMCMP with restrictive/HFPEF phenotype and DMCMP with dilated/HFREF phenotype.<sup>19,30</sup> In DMCMP with restrictive/HFPEF phenotype, the left ventricle is normal sized, hypertrophied, and stiff. At the ultrastructural level, cardiomyocytes are also hypertrophied with normal sarcomeric structure and high resting tension (*Figure 1*). Myocardial collagen volume fraction is moderately raised with collagen deposition in-between cardiomyocytes (i.e. reactive fibrosis) (*Figure 1*). In DMCMP with dilated/HFREF phenotype, the left ventricle is enlarged. At the ultrastructural level, cardiomyocytes appear damaged with loss of sarcomeres (*Figure 1*). Myocardial collagen

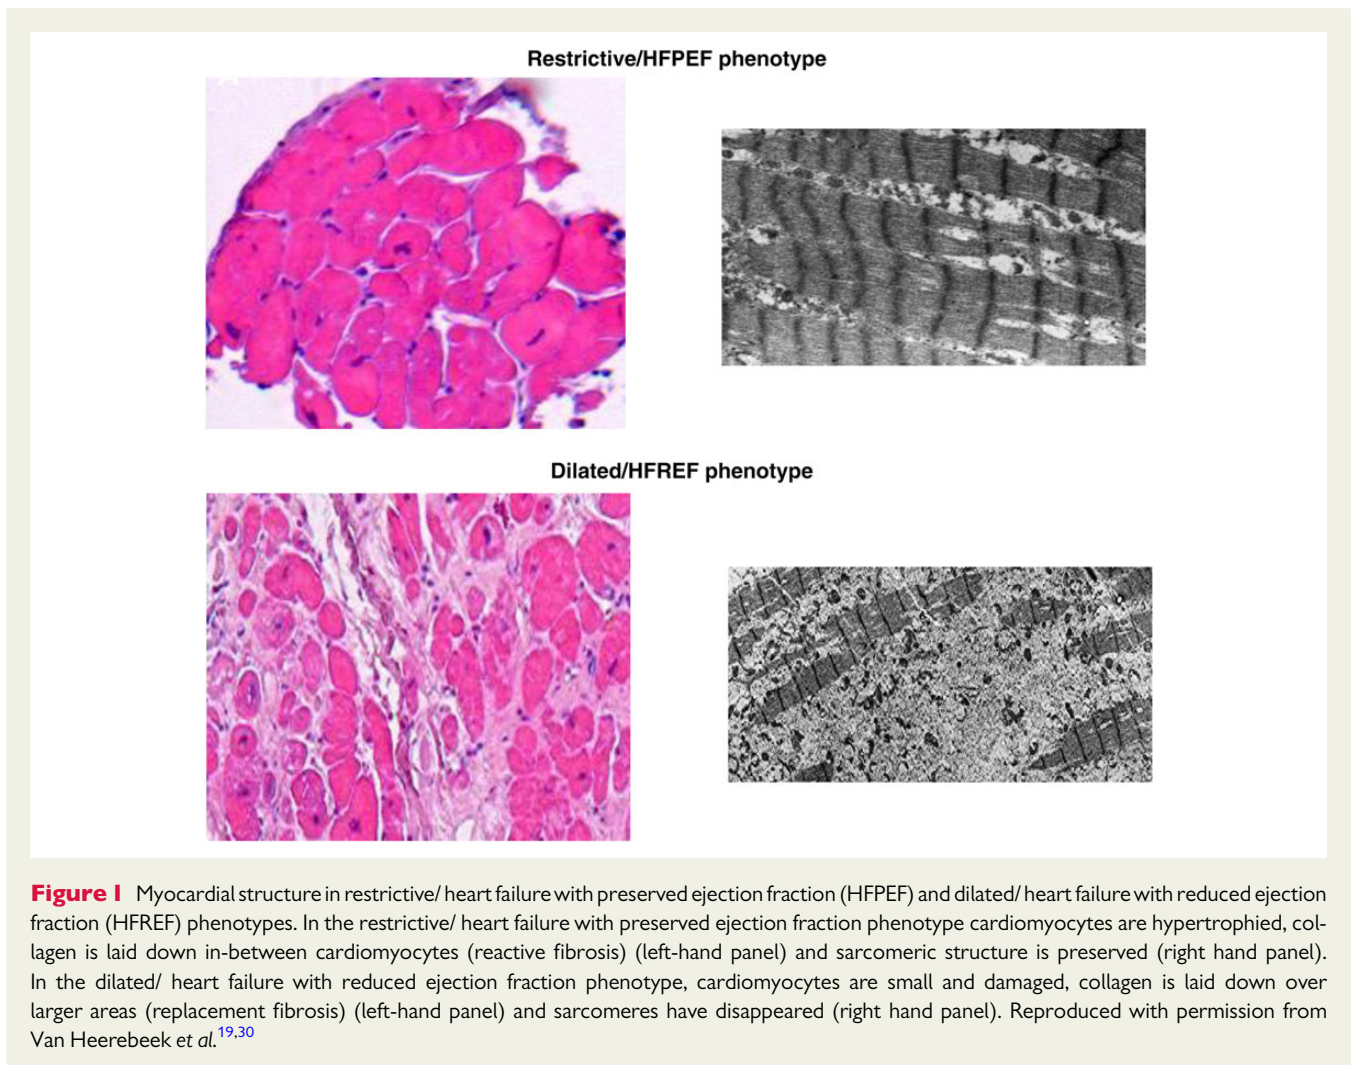

**Figure 1** Myocardial structure in restrictive/ heart failure with preserved ejection fraction (HFPEF) and dilated/ heart failure with reduced ejection fraction (HFREF) phenotypes. In the restrictive/ heart failure with preserved ejection fraction phenotype cardiomyocytes are hypertrophied, collagen is laid down in-between cardiomyocytes (reactive fibrosis) (left-hand panel) and sarcomeric structure is preserved (right hand panel). In the dilated/ heart failure with reduced ejection fraction phenotype, cardiomyocytes are small and damaged, collagen is laid down over larger areas (replacement fibrosis) (left-hand panel) and sarcomeres have disappeared (right hand panel). Reproduced with permission from Van Heerebeek *et al.*<sup>19,30</sup>

volume fraction is high with collagen laid down not only in-between cardiomyocytes but also over larger areas indicative of replacement fibrosis following cardiomyocyte cell death (Figure 1). In both phenotypes, there is coronary microvascular rarefaction and coronary microvascular deposition of AGEs<sup>19</sup> (Figure 2).

Numerous mechanisms have been identified that contribute to myocardial remodelling and dysfunction in DMCMP. These mechanisms include hyperglycaemia, lipotoxicity, microvascular AGEs deposition, microvascular rarefaction, autoimmunity, and insulin resistance/hyperinsulinaemia. They appear to be of variable relevance for the two DMCMP phenotypes: hyperglycaemia, lipotoxicity, and insulin resistance are more important for DMCMP with restrictive/HFPEF phenotype, autoimmunity is especially relevant for DMCMP with dilated/HFREF phenotype and AGEs deposition and microvascular rarefaction seem to contribute to both phenotypes (Figures 3 and 4).

## Hyperglycaemia

Exposure of endothelial cells to hyperglycaemia induces mitochondrial fission and mitochondrial generation of superoxide.<sup>31–34</sup> Increased mitochondrial superoxide production is associated with impaired activation of endothelial nitric oxide (NO) synthase and

reduced cGMP production.<sup>33</sup> This lowers protein kinase G (PKG) activity in adjacent cardiomyocytes<sup>35</sup> and reduces cardiomyocyte distensibility because of hypophosphorylation of the giant cytoskeletal protein titin that functions as a bidirectional spring controlling early diastolic recoil and late diastolic myocardial distensibility.<sup>36,37</sup> A reduced cardiomyocyte distensibility can contribute to the high LV diastolic stiffness observed in DMCMP with restrictive/HFPEF phenotype. Proof of concept for the relevance of this mechanism was provided by *in vitro* experiments, in which PKG administration to cardiomyocytes isolated from DMCMP patients with restrictive/HFPEF phenotype corrected the high cardiomyocyte resting tension.<sup>19</sup> Similar results were also obtained in cardiomyocytes isolated from patients suffering from both aortic stenosis and DM.<sup>38</sup> Apart from altering paracrine endothelial signalling, hyperglycaemia can also directly affect the cardiomyocytes. Contractile dysfunction of right atrial myocardial strips of DM patients was associated with mitochondrial network fragmentation and oxidative stress.<sup>39</sup> The clinical relevance of this contractile dysfunction is however uncertain as all patients had normal LVEF at the time of perioperative procurement of the right atrial strip. Finally, hyperglycaemia raises PKC activity in fibroblasts, which augments collagen production and deposition.<sup>19,38,40</sup>

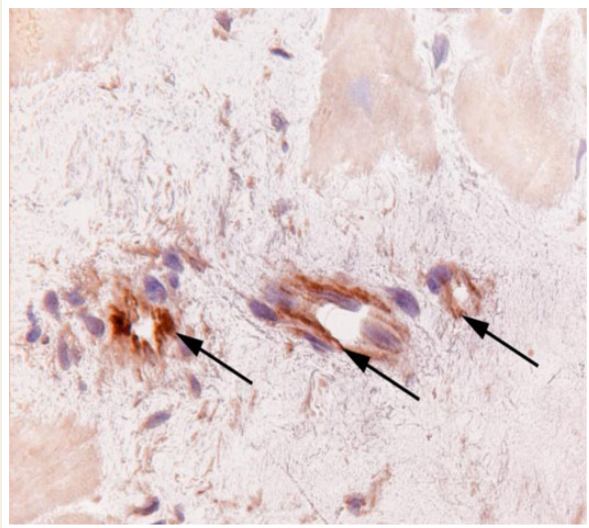

**Figure 2** Microvascular advanced glycation end-products deposition in diabetes mellitus-related cardiomyopathy. AGEs, advanced glycation end-products. Reproduced with permission from van Heerebeek et al.<sup>19</sup>

## Lipotoxicity

The enhanced cardiac free fatty acid uptake in DM patients exceeds the free fatty acid oxidation capacity. This leads to myocardial triglyceride accumulation and can eventually induce cell death. This process is referred to as *lipotoxicity* and has been reported in numerous DM animal models.<sup>41–45</sup> In DM, the contribution of fatty acids to cardiac energy production is larger than normal because of decreased insulin-mediated glucose uptake and because excess fatty acids inhibit glucose utilization.<sup>46</sup> Increased use of free fatty acids was observed clinically in DM patients using positron emission tomography. In these patients, the altered use of substrate was associated with increased cardiac oxygen consumption and LV diastolic dysfunction.<sup>47,48</sup> Excess fatty acid uptake into cardiomyocytes can eventually induce mitochondrial dysfunction, trigger cardiomyocyte cell death, and lead to DMCMP with dilated/HFREF phenotype.<sup>49</sup> Such a lipotoxicity-induced evolution to DMCMP with dilated/HFREF phenotype is however not clinically substantiated because DM patients have preserved LVEF despite appearance of cardiac steatosis on proton-MR spectroscopy.<sup>50,51</sup> Excess myocardial fatty acid uptake can also affect endothelial cells of the coronary microvasculature through generation of toxic lipid intermediates such as diacylglycerol and ceramide.<sup>52,53</sup> Presence of ceramide disrupts endothelial NO synthase signalling and reduces NO bioavailability. This effect

## Clinical DMCMP with Restrictive/HFPEF Phenotype

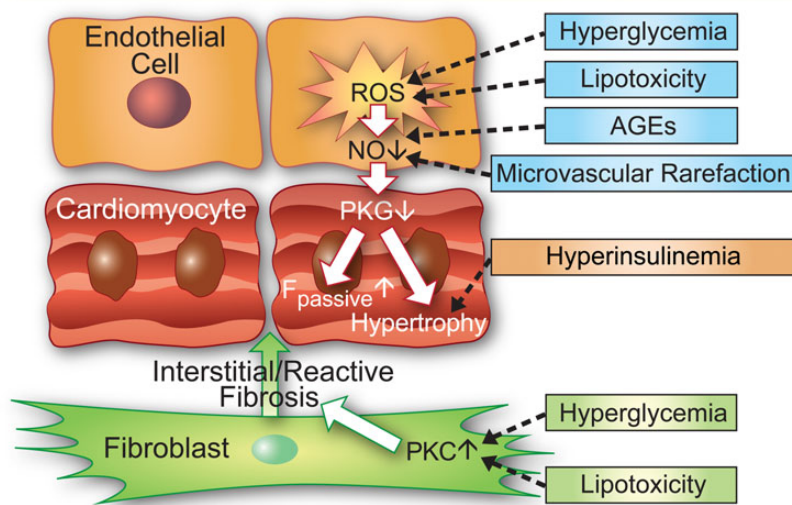

**Figure 3** DM-related pathophysiological mechanisms in diabetes mellitus-related cardiomyopathy with restrictive/ heart failure with preserved ejection fraction phenotype. In diabetes mellitus-related cardiomyopathy with restrictive/ heart failure with preserved ejection fraction phenotype coronary microvascular endothelial dysfunction drives left ventricular remodelling and dysfunction through lowering of myocardial NO bioavailability and PKG activity. This releases the brake on myocardial hypertrophy, stiffens cardiomyocytes (i.e. raised passive force ( $F_{\text{passive}}$ )) and causes reactive interstitial fibrosis. Coronary microvascular endothelial dysfunction results from hyperglycaemia, lipotoxicity, and advanced glycation end-products deposition. Microvascular rarefaction also contributes to low NO bioavailability and hyperinsulinaemia to cardiomyocyte hypertrophy. Hyperglycaemia and lipotoxicity raise PKC in fibroblasts and augment interstitial collagen deposition. DM, diabetes mellitus; DMCMP: diabetic cardiomyopathy; HFPEF, heart failure with preserved ejection fraction; ROS: reactive oxygen species; NO, nitric oxide; PKG, protein kinase G;  $F_{\text{passive}}$ : cardiomyocyte resting tension; AGEs, advanced glycation end-products; PKC, protein kinase C.

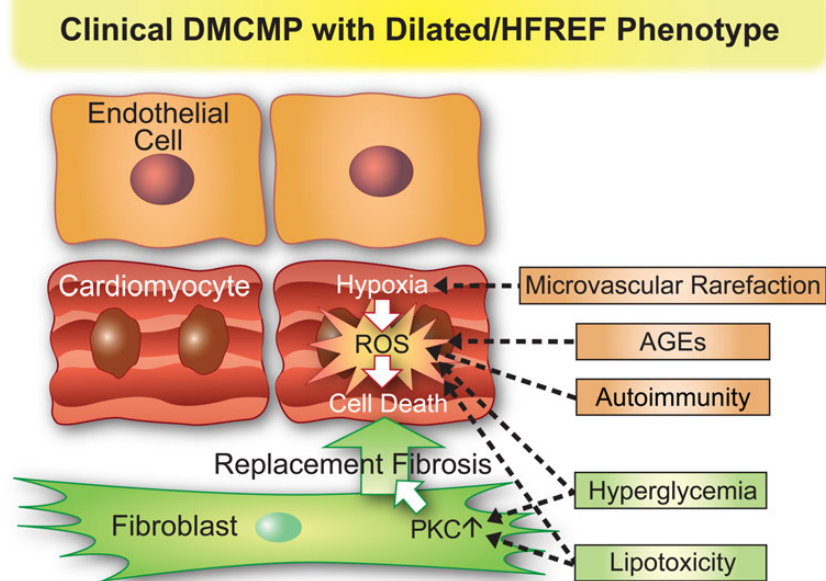

**Figure 4** DM-related pathophysiological mechanisms in diabetes mellitus-related cardiomyopathy with dilated/ heart failure with reduced ejection fraction phenotype. In diabetes mellitus-related cardiomyopathy with dilated/ heart failure with reduced ejection fraction phenotype cardiomyocyte cell death drives left ventricular remodelling and dysfunction. Cardiomyocyte cell death results from oxidative stress within the cardiomyocyte compartment because of tissue hypoxia induced by microvascular rarefaction, presence of autoimmunity-related inflammatory cells, advanced glycation end-products deposition and possibly hyperglycaemia and lipotoxicity. Because of cardiomyocyte cell death there is extensive replacement fibrosis, which is reinforced by high PKC in fibroblasts because of hyperglycaemia and lipotoxicity. DM, diabetes mellitus; DMCMP, diabetic cardiomyopathy; HFREF, heart failure with reduced ejection fraction; ROS, reactive oxygen species; AGEs, advanced glycation end-products; PKC, protein kinase C.

is relevant to the development of DMCMP with restrictive/HFPEF phenotype. Diabetes mellitus-related cardiomyopathy with restrictive/HFPEF phenotype was indeed observed in the aforementioned DM patients with cardiac steatosis, in whom high myocardial triglyceride content related to diastolic LV dysfunction.<sup>51</sup>

### Microvascular advanced glycation end-products deposition

In both DMCMP phenotypes, there is abundant myocardial microvascular AGEs deposition (Figure 2).<sup>19</sup> Light microscopic immunohistochemical visualization of the AGE N<sup>ε</sup>(carboxymethyl)lysine (CML) shows its deposition in the endothelial and smooth muscle cells of the myocardial microvasculature.<sup>19,38</sup> Vascular deposition of AGEs triggers vascular inflammation and quenches endothelially produced NO.<sup>54–56</sup> This lowers myocardial NO bioavailability and predisposes to concentric LV remodelling and high diastolic LV stiffness as observed in DMCMP with restrictive/HFPEF phenotype. Electron microscopic immunohistochemical visualization of the AGE CML reveals that AGEs are also deposited in the myocardial interstitium in between cardiomyocytes.<sup>57</sup> Interstitial AGEs deposition triggers reactive oxygen species production in cardiomyocytes by NADPH oxidase,<sup>58</sup> which could lead to activation of cell death pathways and eccentric LV remodelling with systolic LV dysfunction as observed in DMCMP with dilated/HFREF phenotype. The extent of AGEs deposition is relevant to the therapeutic use of AGE cross-link

breakers such as alagebrium hydrochloride, which yielded favourable results in a limited phase II trial<sup>59</sup> but failed in a large outcome trial.<sup>60</sup>

### Microvascular rarefaction

Apart from vascular AGEs deposition, DM impairs myocardial perfusion through microvascular rarefaction with a reduction in coronary flow reserve.<sup>61</sup> Microvascular rarefaction implies a reduced capillary surface area relative to cardiomyocyte surface area and results mainly from cardiomyocyte hypertrophy.<sup>19</sup> Microvascular rarefaction lowers NO bioavailability for adjacent cardiomyocytes and can therefore contribute to DMCMP with restrictive/HFPEF phenotype. Microvascular rarefaction could eventually also lead to tissue hypoxia with production of reactive oxygen species, cell death, and DMCMP with dilated/HFREF phenotype.

### Autoimmunity

Cardiac myosin autoantibody signatures were identified that were shared between type 1 DM (T1DM) patients after myocardial infarction and non-diabetic patients with myocarditis. These findings suggested a post-MI autoimmune syndrome in T1DM patients.<sup>62</sup> Patients with DM were recently also shown to have cardiac release of troponin T, which was related to clinical outcome.<sup>63</sup> Such a continuous release of troponin T could trigger an autoimmune response, especially in autoimmune-prone T1DM patients and predispose them to DMCMP with dilated/HFREF phenotype.

## Insulin resistance/hyperinsulinaemia

Insulin resistance/hyperinsulinaemia is another important metabolic disturbance especially in obese T2DM patients. Insulin resistance induces a cluster of metabolic or signalling derangements especially relevant to DMCMP with restrictive/HFPEF phenotype.<sup>64–66</sup> The underlying obesity causes a systemic pro-inflammatory state with high circulating levels of pro-inflammatory cytokines,<sup>67</sup> which induce endothelial production of reactive oxygen species and reduce NO bioavailability for neighbouring cardiomyocytes.<sup>16</sup> Insulin resistance impairs myocardial glucose utilization and leads to less efficient high-energy phosphate production through increased expression of myocardial uncoupling proteins with production of heat rather than adenosine triphosphate (ATP).<sup>68,69</sup> As a result, a low phosphocreatine/adenosine triphosphate (PCr/ATP) ratio has been observed in obese, T2DM, and HFPEF patients.<sup>70–72</sup> In all these conditions, it was related to diastolic LV dysfunction at rest or during exercise. Insulin resistance also affects a number of signalling pathways, which are involved in cardiomyocyte hypertrophy, such as PI3K/Akt signalling.<sup>73</sup> Hyperinsulinaemia could therefore account for the pronounced cardiomyocyte hypertrophy observed in DMCMP with restrictive/HFPEF phenotype.<sup>19</sup> Via PI3K/Akt signalling, insulin also directly reduces cardiomyocyte distensibility as it enhances expression of the stiff N2B titin isoform.<sup>74</sup>

Table 1 summarizes the relevance of DM-related pathophysiological mechanisms for both DMCMP phenotypes. Metabolic abnormalities such as hyperglycaemia, lipotoxicity, and insulin resistance/hyperinsulinaemia favour the development of DMCMP with restrictive/HFPEF phenotype. In contrast, autoimmunity, which usually manifests itself in autoimmune-prone T1DM patients, predisposes to a myocarditis-like DMCMP with dilated/HFREF phenotype. Limited myocardial perfusion because of AGEs deposition and microvascular rarefaction could be relevant for both DMCMP phenotypes because of reduced endothelial NO production, which favours development of DMCMP with restrictive/HFPEF phenotype and because of tissue

hypoxia, which induces cardiomyocyte cell death and DMCMP with dilated/HFREF phenotype. Other pathophysiological mechanisms could be relevant for subsets of DM patients such as DM patients suffering from autonomic neuropathy. In these patients, sympathetic denervation causes impaired  $\beta$ -adrenergic signalling which reduces myocardial contractile strength, relaxation kinetics, and diastolic distensibility.<sup>75,76</sup>

## Diagnosis of diabetes mellitus-related cardiomyopathy with restrictive/heart failure with preserved left ventricular ejection fraction phenotype

Diabetes mellitus-related cardiomyopathy patients with restrictive/HFPEF phenotype are usually obese and suffer of T2DM. Patients will present with complaints of dyspnoea and/or pedal oedema. Physical examination will reveal an S4 gallop sound and signs of left- and right-sided congestion such as bibasilar rales, distended neck veins, and increased liver span.

The diagnosis of DMCMP with restrictive/HFPEF phenotype requires exclusion of coronary artery, valvular, congenital, infiltrative, or hypertensive heart disease<sup>4</sup> (Table 2 and Figure 5). Presence of significant coronary artery, valvular, or congenital heart disease can easily be excluded using coronary angiography and Doppler echocardiographic imaging. Endomyocardial biopsy is indicated when there is concern about infiltrative heart disease. In accordance to published guidelines, HF associated with unexplained restrictive cardiomyopathy is considered a class IIa indication for endomyocardial biopsy procurement.<sup>77</sup> The relative importance of arterial hypertension and DM for a restrictive/HFPEF phenotype of LV remodelling is often difficult to establish as it is unclear if the observed concentric LV remodelling and diastolic LV dysfunction are caused by the systolic LV overload of arterial hypertension or by the metabolic disturbances of DM. Some recent evidence favours diastolic LV dysfunction to be maintained more by metabolic disturbances than by systolic overload. In the MONICA registry left atrial size, a reliable measure of chronic diastolic LV dysfunction, strongly related to body mass index and weakly to ageing but failed to relate to arterial hypertension.<sup>78</sup> Similarly, a Japanese study identified body mass index but not arterial hypertension as a significant predictor of HFPEF development in DM.<sup>79</sup> Finally, a recent epidemiological survey in Olmsted County revealed ageing-related changes in diastolic LV stiffness to be related to gain in body weight and unrelated to blood pressure.<sup>80</sup>

After exclusion of concomitant coronary, valvular, congenital, infiltrative, or hypertensive heart disease, the diagnosis of DMCMP with restrictive/HFPEF phenotype requires evidence of normal systolic LV function, of diastolic LV dysfunction, and of impaired glucose metabolism. Evidence of normal systolic LV function and of diastolic LV dysfunction can be obtained as outlined in the recent recommendations for the diagnosis of HFPEF established by the HF and echocardiography associations of the ESC.<sup>9</sup> Evidence of normal systolic LV function has to consist not only of a normal LVEF ( $\geq 50\%$ ) but also of a normal LV end-diastolic volume index ( $\leq 97 \text{ mL/m}^2$ ). Evidence of diastolic LV dysfunction can be obtained

**Table 1** Relative importance of DM-related pathophysiological mechanisms for development of diabetes mellitus-related cardiomyopathy with restrictive/ heart failure with preserved left ventricular ejection fraction or dilated/ heart failure with reduced ejection fraction phenotypes

|                                          | DMCMP with restrictive/HFPEF phenotype | DMCMP with dilated/HFREF phenotype |
|------------------------------------------|----------------------------------------|------------------------------------|
| Hyperglycaemia                           | +++                                    | +                                  |
| Lipotoxicity                             | +++                                    | +                                  |
| AGEs deposition                          | +++                                    | +++                                |
| Microvascular rarefaction                | +++                                    | +++                                |
| Autoimmunity                             | –                                      | +++                                |
| Insulin resistance/<br>Hyperinsulinaemia | +++                                    | –                                  |

DM, diabetes mellitus; DMCMP, diabetic cardiomyopathy; HFPEF, heart failure with preserved ejection fraction; HFREF, heart failure with reduced ejection fraction; AGEs, advanced glycation end-products.

**Table 2** Comparison between diabetes mellitus-related cardiomyopathy with restrictive/heart failure with preserved left ventricular ejection fraction and dilated/heart failure with reduced ejection fraction phenotypes

|                      | DMCMP with restrictive/HFPEF phenotype                                                                                                                                                                                                                                                                                                                                                     | DMCMP with dilated/HFREF phenotype                                                                                                                                                                                                                                                                                                                              |
|----------------------|--------------------------------------------------------------------------------------------------------------------------------------------------------------------------------------------------------------------------------------------------------------------------------------------------------------------------------------------------------------------------------------------|-----------------------------------------------------------------------------------------------------------------------------------------------------------------------------------------------------------------------------------------------------------------------------------------------------------------------------------------------------------------|
| Pathophysiology      |                                                                                                                                                                                                                                                                                                                                                                                            |                                                                                                                                                                                                                                                                                                                                                                 |
| Myocardial structure | <ul style="list-style-type: none"> <li>Cardiomyocyte hypertrophy</li> <li>Reactive interstitial fibrosis</li> <li>Microvascular AGEs</li> <li>Microvascular rarefaction</li> </ul>                                                                                                                                                                                                         | <ul style="list-style-type: none"> <li>Cardiomyocyte apoptosis</li> <li>Cardiomyocyte necrosis</li> <li>Reactive interstitial fibrosis</li> <li>Replacement fibrosis</li> <li>Microvascular AGEs</li> <li>Microvascular rarefaction</li> </ul>                                                                                                                  |
| Myocardial function  | <ul style="list-style-type: none"> <li>Cardiomyocyte stiffness ↑↑</li> </ul>                                                                                                                                                                                                                                                                                                               | <ul style="list-style-type: none"> <li>Cardiomyocyte stiffness ↑</li> <li>Cardiomyocyte shortening ↓</li> </ul>                                                                                                                                                                                                                                                 |
| Mechanisms           | <ul style="list-style-type: none"> <li>Endothelial dysfunction caused by hyperglycaemia, lipotoxicity, and AGEs</li> <li>Microvascular dysfunction leading to low NO bioavailability</li> <li>Cardiomyocyte hypertrophy because of hyperinsulinaemia</li> </ul>                                                                                                                            | <ul style="list-style-type: none"> <li>Cardiomyocyte cell death caused by autoimmunity and AGEs</li> <li>Microvascular dysfunction leading to cardiomyocyte hypoxia</li> </ul>                                                                                                                                                                                  |
| Diagnosis            | <ul style="list-style-type: none"> <li>DM (mainly T2DM, obese)</li> <li>Dyspnoea and signs of congestion, S4 Gallop</li> <li>No coronary, valvular, or congenital cardiac disease</li> <li>No arterial hypertension</li> <li>No infiltrative heart disease in endomyocardial biopsy</li> <li>LVEF ≥ 50%</li> <li>LVEDVI ≤ 97 mL/m<sup>2</sup></li> <li>Diastolic LV dysfunction</li> </ul> | <ul style="list-style-type: none"> <li>DM (mainly longstanding T1DM)</li> <li>Dyspnoea and signs of congestion, S3 Gallop</li> <li>No coronary, valvular, or congenital cardiac disease</li> <li>No arterial hypertension</li> <li>No inflammation or virus in endomyocardial biopsy</li> <li>LVEF &lt; 50%</li> <li>LVEDVI &gt; 97 mL/m<sup>2</sup></li> </ul> |
| Treatment            | <ul style="list-style-type: none"> <li>Diuretics</li> </ul>                                                                                                                                                                                                                                                                                                                                | <ul style="list-style-type: none"> <li>ACEIs, ARBs, β-blockers, mineralocorticoid-receptor antagonists, ivabradine</li> <li>Resynchronization</li> </ul>                                                                                                                                                                                                        |

DM, diabetes mellitus; T1DM, type 1 diabetes mellitus; T2DM, type 2 diabetes mellitus; DMCMP, diabetic cardiomyopathy; HFPEF, heart failure with preserved ejection fraction; HFREF, heart failure with reduced ejection fraction; AGEs, advanced glycation end-products; NO, nitric oxide; LVEF, left ventricular ejection fraction; LVEDVI, left ventricular end-diastolic volume index; ACEIs, angiotensin-converting enzyme inhibitors; ARBs, angiotensin II receptor blockers.

invasively or non-invasively with Doppler echocardiography and biomarkers. Only when  $E/E'$  (ratio of early transmitral velocity to TDI mitral annular early diastolic velocity) exceeds 15, does Doppler echocardiography provide direct evidence of diastolic LV dysfunction. When  $8 < E/E' < 15$ , secondary evidence of diastolic LV dysfunction is required. This can be derived from mitral flow velocity Doppler, combined mitral and pulmonary vein flow velocity Doppler, left atrial size, LV hypertrophy and presence of atrial fibrillation or elevated natriuretic peptides. Natriuretic peptides do not provide stand-alone evidence of diastolic LV dysfunction because of their poor positive predictive value for HFPEF. Patients with HFPEF indeed have lower plasma natriuretic peptide levels than patients with HFREF.<sup>81</sup> Levels are especially low in HFPEF patients presenting in an outpatient clinic with complaints of limited exercise tolerance.<sup>82</sup> The limited value of natriuretic peptides for the diagnosis of HFPEF was confirmed in the large HFPEF registry of the diastolic

congestive heart failure study<sup>83</sup> which observed a sensitivity of 65% for the diagnosis of HFPEF when using the recommended N-terminal-pro brain natriuretic peptide cut-off value of 220 pg/mL.<sup>9</sup> Even lower sensitivities (27 and 38%) were recently reported in a critical comparison of diagnostic HFPEF algorithms.<sup>84</sup> This comparative analysis of HFPEF algorithms confirmed the diagnostic accuracy of the recommendations for the diagnosis of diastolic LV dysfunction established by the HF and echocardiography associations of the ESC<sup>9</sup> as sensitivity and specificity of this algorithm were the highest, equaling, respectively, 76 and 85%.

The diagnosis of DMCMP with restrictive/HFPEF phenotype requires evidence of impaired glucose metabolism. It should be noted that insulin resistance usually precedes manifest hyperglycaemia by years if not decades. Accordingly, a substantial proportion of patients is in a state of latent impairment of glucose metabolism without manifest hyperglycaemia.<sup>85,86</sup>

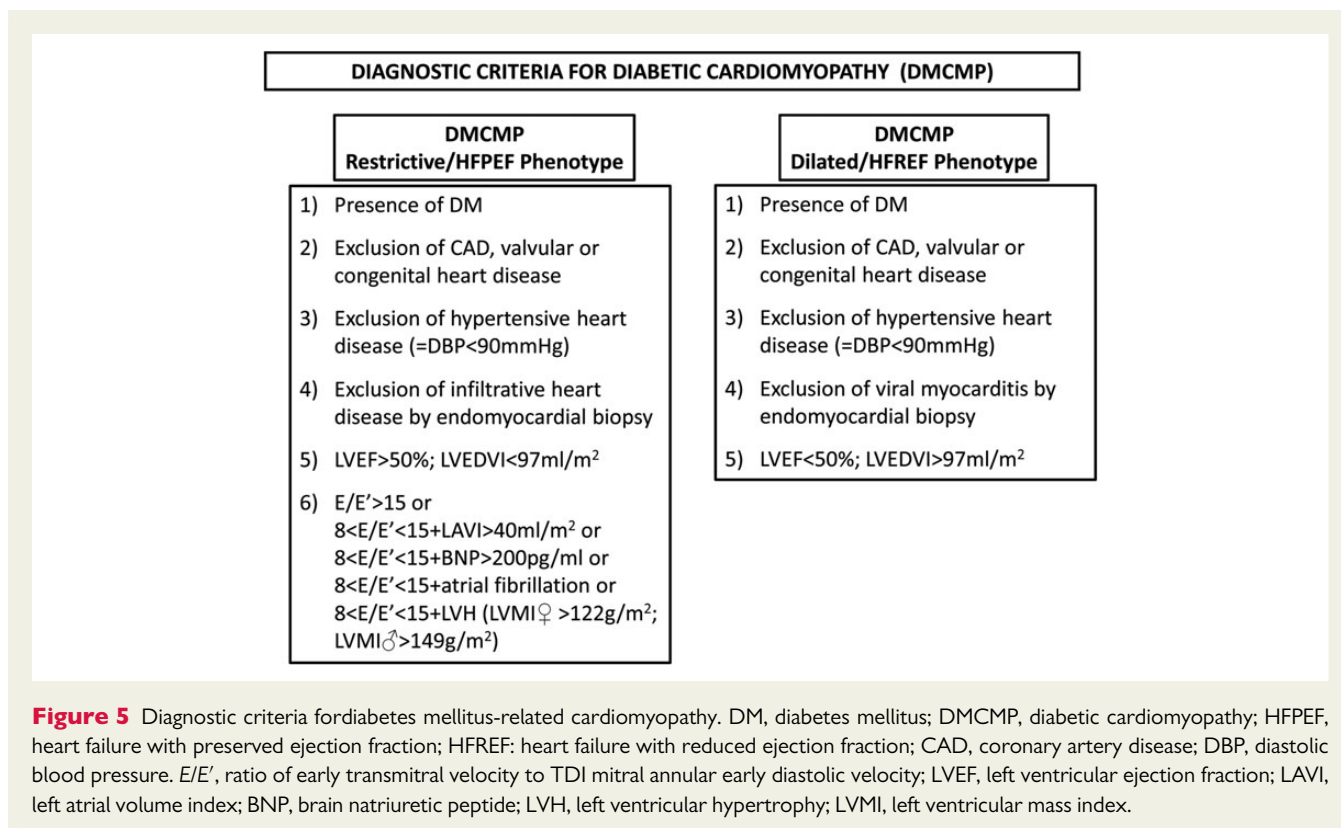

The future diagnosis of DMCMP with restrictive/HFPEF phenotype will probably rely more heavily on use of biomarkers<sup>87</sup> and on cardiac magnetic resonance imaging. A series of recent studies indeed demonstrated HFPEF to be associated with high plasma levels of biomarkers of inflammation and of collagen turnover.<sup>88–90</sup> Cardiac magnetic resonance is useful for the diagnosis of DMCMP with restrictive/HFPEF phenotype as it allows for accurate assessment of left atrial volume and LV mass and of interstitial fibrosis using T1 mapping technique.

## Treatment of diabetes mellitus-related cardiomyopathy with restrictive/heart failure with preserved left ventricular ejection fraction phenotype

### HF treatment

In contrast to HFREF, large outcome trials in HFPEF using angiotensin-converting enzyme inhibitors (ACEis), angiotensin II receptor blockers (ARBs), and mineralocorticoid-receptor antagonists yielded neutral results for endpoints such as overall mortality, cardiac mortality, or need for hospitalizations.<sup>91–93</sup> Because of absence of prognostic benefit of ACEis, ARBs, or spironolactone, current HF guidelines limit treatment recommendations for HFPEF to control of arterial hypertension and use of diuretics.<sup>94</sup> Use of  $\beta$ -blockers in HFPEF is also questionable. A recent study, that assessed  $\beta$ -blocker

use in HFPEF, actually demonstrated worse outcome in terms of symptoms or need for hospitalizations especially in women.<sup>95</sup> The neutral outcome of the large HFPEF treatment trials has been related to unsatisfactory HFPEF patient recruitment criteria,<sup>17</sup> but it may also relate to different mechanisms driving LV remodelling in HFPEF and HFREF. Concentric LV remodelling in HFPEF was recently proposed to be driven by coronary microvascular endothelial inflammation because of comorbidities in contrast to eccentric LV remodelling in HFREF, which is driven by cardiomyocyte death because of ischaemia, viral infection, or toxicity.<sup>16</sup> This new paradigm emphasizes the importance of metabolic comorbidities like obesity and DM, which constantly fuel the LV remodelling process in HFPEF through a systemic pro-inflammatory state. Against such a relentless pro-inflammatory background, inefficacy in HFPEF of neurohumoral blockade is no surprise because in HFREF viral persistence or failure to discontinue toxic agents also greatly reduces the benefit of neurohumoral blockade.

### Lifestyle modification

Over the last decennium numerous investigators attempted to correct diastolic LV dysfunction of DMCMP with restrictive/HFPEF phenotype through manipulation of myocardial metabolism. In these patients, myocardial glucose uptake is replaced by uptake of non-esterified fatty acids and this substrate switch is associated with diastolic LV dysfunction.<sup>48,96</sup> Prolonged caloric restriction in obese T2DM patients decreased myocardial triglyceride content and improved diastolic LV dysfunction.<sup>97</sup> Following an exercise training programme, obese patients with normal LVEF (>50%) lowered



cardiac lipid content and raised LVEF by 2%<sup>98</sup> but T2DM patients with normal LVEF failed to decrease cardiac lipid content despite a similar 5% improvement in LVEF.<sup>99</sup> These data on the effects of lifestyle modification indicate coupling between myocardial metabolism and function to vary in accordance to extent of metabolic compromise (e.g. obesity vs. DM) and support the notion of myocardial metabolic inflexibility in DM.<sup>100</sup> Metabolic inflexibility was also obvious from the use of acipimox, which inhibits lipolysis and drastically lowers serum free fatty acid concentrations. Acipimox deteriorated cardiac efficiency consistent with inability to use glucose as alternative metabolic substrate.<sup>101</sup> In an intention to treat analysis participation in a regular exercise programme failed to alter progression of diastolic LV dysfunction in DMCM patients with restrictive/HFPEF phenotype but in the subset of patients that finished the 3 year programme it prevented progression of diastolic LV dysfunction.<sup>102</sup> The positive outcome of exercise training in DMCM with restrictive/HFPEF phenotype is in line with beneficial effects of similar exercise training programmes in the overall HFPEF population.<sup>103,104</sup>

## Glucose-lowering medications

### Metformin and sulfonylureas

Metformin exerts its favourable action through reduced hepatic glucose production and activation of adenosine monophosphate activated protein kinase (AMPK). Because of activation of AMPK, metformin could induce regression of myocardial hypertrophy. Several randomized trials however failed to clinically substantiate this effect. Because of concerns of induction of lactic acidosis, metformin was considered contraindicated in HF. Recently, these concerns appeared unjustified and metformin is considered safe in patients with both DM and HF.<sup>105</sup> Treatment with metformin also restores endothelium-dependent vasodilation through increased NO bioavailability. In a comparative analysis with pioglitazone, metformin however failed to improve LV stiffness in T2DM despite increased NO bioavailability.<sup>106</sup> Sulfonylureas bind to ATP-sensitive potassium channels, which are involved in the myocardial response to ischaemia. As they can potentially interfere with adaptive responses to ischaemia, their use in DMCM is not recommended.

### Thiazolidinediones

Pioglitazone has been shown to improve diastolic LV stiffness in men with uncomplicated T2DM, in whom inducible ischaemia was excluded.<sup>106</sup> This improvement was accompanied by a higher glucose but unchanged fatty acid uptake, oxidation, or esterification and therefore probably resulted from mechanistic pathways directly affecting diastolic LV dysfunction. In this respect, a substudy of this trial demonstrated significant associations between diastolic LV dysfunction and adiponectin or osteoprotegerin, a soluble member of the TNF receptor superfamily.<sup>107</sup> Whether the pioglitazone-induced improvement of diastolic LV dysfunction translates into prognostic or symptomatic benefit for DMCM with restrictive/HFPEF phenotype remains doubtful because of reports of aggravated oedema with thiazolidinediones.<sup>108</sup>

### Insulin

Use of the intense insulin therapy also failed to provide evidence that diastolic LV dysfunction in DMCM with restrictive/HFPEF phenotype can be corrected by manipulation of myocardial metabolism.

Despite a promising pilot study,<sup>109</sup> the DADD trial which compared the effects on diastolic LV dysfunction of intense insulin and oral glucose-lowering therapy had a neutral outcome.<sup>110</sup> This neutral outcome could be explained by the relatively good glycaemic control prior to the intervention and by the opposite evolution of BMI in both study groups with weight gain in the intense insulin and weight loss in the control group. The latter suggests a harmful effect on obesity to eventually override a beneficial effect on hyperglycaemia.

### Dipeptidyl peptidase 4 inhibitors and GLP-1 agonists

Use of dipeptidyl peptidase 4 (DPP4) inhibitors has recently been linked to an increased incidence of HF hospitalizations without raising the incidence of myocardial infarctions or strokes.<sup>111–113</sup> The HF phenotype (HFPEF or HFREF) responsible for this increased incidence of HF hospitalizations remains unclear but in the absence of an increased incidence of myocardial infarctions, an HFPEF phenotype seems likely. A higher incidence of HF in DM patients treated with either thiazolidinediones or DPP4 inhibitors raises suspicion that it is not a class-specific side-effect but more generally linked to forced entry of glucose into metabolically inflexible cardiomyocytes. A forced entry of glucose stimulates glycolysis and leads to intracellular acidosis when glucose oxidation fails to rise proportionally. This mechanism has previously also been invoked to explain the neutral outcome of glucose-insulin-potassium regimens.<sup>114</sup> As intracellular acidosis reduces distensibility of titin,<sup>115</sup> it could adversely affect diastolic LV dysfunction in DMCM with restrictive/HFPEF phenotype. Despite favourable reports of glucagon like peptide-1 agonists on myocardial function in animal studies, a meta-analysis failed to reveal a significant effect on natriuretic peptide levels in HF.<sup>116</sup>

### Sodium glucose transporter 2 inhibitors

Sodium glucose transporter 2 inhibitors lower blood glucose through increased renal glucose elimination.<sup>117</sup> Because their mode of action is insulin independent, they promote weight loss and avoid deleterious effects of hyperinsulinaemia on diastolic LV function. Eventual beneficial effects on DMCM with restrictive/HFPEF phenotype still need to be evaluated.

## Diagnosis of diabetes mellitus-related cardiomyopathy with dilated/heart failure with reduced ejection fraction phenotype

Diabetes mellitus-related cardiomyopathy patients with dilated/HFREF phenotype usually have longstanding T1DM. Patients will present with complaints of dyspnoea and/or pedal oedema. Physical examination will reveal a displaced apical impulse, an S3 gallop sound and signs of left- and right-sided congestion.

Diagnosis of DMCM with dilated/HFREF phenotype is based on: (i) exclusion of coronary, valvular, congenital, or hypertensive heart disease; (ii) evidence of eccentric LV remodelling with LV cavity dilatation and depressed LVEF; (iii) exclusion of dilated familial cardiomyopathy or dilated cardiomyopathy induced by toxic agents or

myocarditis; and (iv) the presence of impaired glucose metabolism evident from fasting or post-load hyperglycaemia (Table 2 and Figure 5). Significant coronary, valvular, or congenital heart disease should be excluded by coronary angiography, Doppler echocardiographic or MRI imaging. The same imaging techniques will also provide evidence of eccentric LV remodelling (i.e. low LV mass/volume ratio), depressed LVEF (<50%), and LV cavity dilatation (LVEDVI >97 mL/m<sup>2</sup>). For the diagnosis of dilated familial cardiomyopathy, a gene defect specifically affecting cardiac muscle proteins should be identified because familial occurrence of T1DM could also be responsible for hereditary DMCMP with dilated/HFREF phenotype. Diabetes mellitus-related cardiomyopathy with dilated/HFREF phenotype can be difficult to distinguish from dilated cardiomyopathy following viral myocarditis. Under these circumstances endomyocardial biopsy is useful. Presence of an inflammatory infiltrate makes cardiomyopathy following viral myocarditis more likely, although diabetes sometimes presents with autoimmune features<sup>62</sup> and extensive AGEs deposition can trigger an inflammatory response.<sup>54,55</sup> Viral presence should be confirmed in the biopsy using electronmicroscopy or polymerase chain reaction.<sup>118</sup> Electronmicroscopy can also reveal nuclear blebs characteristic of familial laminopathies. Although endomyocardial biopsy can provide evidence for exclusion of ongoing myocarditis, it currently does not provide positive arguments for the diagnosis of DMCMP with dilated/HFREF phenotype. In this respect, immunohistochemical quantification of myocardial microvascular AGEs deposition<sup>19,38</sup> could provide a diagnostic inroad because of the association of DMCMP with dilated/HFREF phenotype with other manifestations of microangiopathy such as glomerulosclerosis or retinopathy.<sup>3</sup> Cardiac magnetic resonance is also helpful for the diagnosis of DMCMP with dilated/HFREF phenotype as it allows for accurate assessment of LV volumes, LVEF, LV mass, and replacement fibrosis using late gadolinium enhancement.

## Treatment of diabetes mellitus-related cardiomyopathy with dilated/heart failure with reduced ejection fraction phenotype

### HF treatment

Treatment of DMCMP with dilated/HFREF phenotype should be conducted in accordance to current guidelines<sup>94</sup> and includes a combination of ACEis, ARBs,  $\beta$ -blockers, aldosterone antagonists, ivabradine, and resynchronization therapy. Although these treatment modalities have not been formally tested in DMCMP with dilated/HFREF phenotype, most of them have been assessed in subgroups of HFREF patients with DM, in whom positive outcome persisted.<sup>119,120</sup>

### Glucose-lowering medications

The use of insulin in advanced HF with HFREF phenotype is associated with an increased mortality risk.<sup>121</sup> It remains however unclear if this higher risk relates to use of insulin or to longer duration

of DM. Numerous experimental studies observed beneficial effects of metformin in ischaemic myocardium. Clinical outcome studies however failed to confirm these observations.<sup>122</sup> Sitagliptin was also reported to improve function of ischaemic myocardium<sup>123</sup> but in view of the recently reported increase in HF with use of DPP-4 inhibitors,<sup>111,112</sup> this action apparently has limited clinical relevance.

## Clinical perspective

Diabetes mellitus-related cardiomyopathy was initially identified as a cardiomyopathy with a dilated/HFREF phenotype. Currently it manifests itself mainly as a cardiomyopathy with a restrictive/HFPEF phenotype. The existence of two distinct DMCMP phenotypes could be related to unequal contributions of DM-linked pathophysiological mechanisms, which result in coronary microvascular endothelial dysfunction in DMCMP with restrictive/HFPEF phenotype and in cardiomyocyte cell death in DMCMP with dilated/HFREF phenotype. Future research into pathophysiological mechanisms responsible for DMCMP should be phenotype specific and focus on signalling between endothelium and cardiomyocytes in DMCMP with restrictive/HFPEF phenotype and on autoimmunity directed against cardiomyocytes in DMCMP with dilated/HFREF phenotype. Diagnostic algorithms and therapeutic strategies also differ in both phenotypes. Guidelines-based HF therapy is applicable to DMCMP with dilated/HFREF phenotype in contrast to DMCMP with restrictive/HFPEF phenotype which seems to benefit more from lifestyle modification. Future large outcome trials for treatment of DMCMP should use phenotype-specific patient cohorts and address pathophysiological mechanisms relevant for each phenotype.

## Funding

W.J.P. is supported by a grant from the European Commission (FP7-Health-2010; MEDIA-261409) and a grant from the Dutch Heart Foundation (CVON-2011; ARENA).

**Conflict of interest:** none declared.

## References

- Lundbaek K. Diabetic angiopathy. A specific vascular disease. *Lancet* 1954;**263**: 377–379.
- Lundbaek K. Is there a diabetic cardiomyopathy? In: Schettler G. (ed.), "Pathogenetische Faktoren des Myokardinfarkts". Schattauer, Stuttgart, 1969, 63–71.
- Rubler S, Dlugash J, Yuceoglu YZ, Kumral T, Branwood AV, Grishman A. New type of cardiomyopathy associated with diabetic glomerulosclerosis. *Am J Cardiol* 1972;**30**:595–602.
- Elliott P, Andersson B, Arbustini E, Bilinska Z, Cecchi F, Charron P, Dubourg O, Kühl U, Maisch B, McKenna WJ, Monserrat L, Pankuweit S, Rapezzi C, Seferovic P, Tavazzi L, Keren A. Classification of the cardiomyopathies: a position statement from the European Society Of Cardiology Working Group on Myocardial and Pericardial Diseases. *Eur Heart J* 2008;**29**:270–276.
- Marwick TH. Diabetic Cardiomyopathy. In: Crawford MH, DiMarco JP, Paulus WJ. (eds.), *Cardiology*, 3rd ed. Philadelphia, Mosby-Elsevier, 2010; 1107–1109.
- Forbes JM, Cooper ME. Mechanisms of diabetic complications. *Physiol Rev* 2013;**93**: 137–188.
- Owan TE, Hodge DO, Herges RM, Jacobsen SJ, Roger VL, Redfield MM. Trends in prevalence and outcome of heart failure with preserved ejection fraction. *N Engl J Med* 2006;**355**:251–259.
- European Study Group on Diastolic Heart Failure. How to diagnose diastolic heart failure. *Eur Heart J* 1998;**19**:990–1003.
- Paulus WJ, Tschöpe C, Sanderson JE, Rusconi C, Flachskampf FA, Rademakers FE, Marino P, Smiseth OA, De Keulenaer G, Leite-Moreira AF, Borbély A, Edes I, Handoko ML, Heymans S, Pezzali N, Pieske B, Dickstein K, Fraser AG, Brutsaert DL. How to diagnose diastolic heart failure: a consensus statement on

- the diagnosis of heart failure with normal left ventricular ejection fraction by the Heart Failure and Echocardiography Associations of the European Society of Cardiology. *Eur Heart J* 2007;**28**:2539–2550.
10. McMurray J, Pfeffer MA. New therapeutic options in congestive heart failure. Part II. *Circulation* 2002;**105**:2223–2228.
  11. Fang ZY, Prins JB, Marwick TH. Diabetic cardiomyopathy: evidence, mechanisms, and therapeutic implications. *Endocrine Rev* 2004;**25**:543–567.
  12. Maisch B, Alter P, Pankuweit S. Diabetic cardiomyopathy – fact or fiction? *Herz* 2011;**36**:102–115.
  13. Dunlay SM, Roger VL, Weston SA, Jiang R, Redfield MM. Longitudinal changes in ejection fraction in heart failure patients with preserved and reduced ejection fraction. *Circ Heart Fail* 2012;**5**:720–726.
  14. Cheng S, Xanthakis V, Sullivan LM, Lieb W, Massaro J, Aragam J, Benjamin EJ, Vasan RS. Correlates of echocardiographic indices of cardiac remodeling over the adult life course: longitudinal observations from the Framingham Heart Study. *Circulation* 2010;**122**:570–578.
  15. Lam CS, Roger VL, Rodeheffer RJ, Bursi F, Borlaug BA, Ommen SR, Kass DA, Redfield MM. Cardiac structure and ventricular-vascular function in persons with heart failure and preserved ejection fraction from Olmsted County. *Circulation* 2007;**115**:1982–1990.
  16. Paulus WJ, Tschoepe C. A novel paradigm for heart failure with preserved ejection fraction: comorbidities drive myocardial dysfunction and remodeling through coronary microvascular endothelial inflammation. *J Am Coll Cardiol* 2013;**62**:263–271.
  17. Paulus WJ, v Ballegoij JJM. Treatment of heart failure with normal ejection fraction. An inconvenient truth!. *J Am Coll Cardiol* 2010;**55**:526–537.
  18. Bertoni AG, Tsai A, Kasper EK, Brancati FL. Diabetes and idiopathic cardiomyopathy. A nationwide case-control study. *Diabetes Care* 2003;**26**:2791–2795.
  19. Van Heerebeek L, Hamdani N, Handoko L, Falcao-Pires I, Musters RJ, Kupreishvili K, Ijsselmuiden AJ, Schalkwijk CG, Bronzwaer JGF, Diamant M, Borbely A, van der Velden J, Stienen GJM, Laarman GJ, Niessen HWM, Paulus WJ. Diastolic stiffness of the failing diabetic heart: importance of fibrosis, advanced glycation endproducts and myocyte resting tension. *Circulation* 2008;**117**:43–51.
  20. Lindman BR, Dávila-Román VG, Mann DL, McNulty S, Semigran MJ, Lewis GD, de Las Fuentes L, Joseph SM, Vader J, Hernandez AF, Redfield MM. Cardiovascular phenotype in HFpEF patients with or without diabetes: A RELAX trial ancillary study. *J Am Coll Cardiol* 2014;**64**:541–549.
  21. Kamalesh M, Nair G. Disproportionate increase in prevalence of diabetes among patients with congestive heart failure due to systolic dysfunction. *Int J Cardiol* 2005;**99**:125–127.
  22. Bertoni AG, Hundley WG, Massing MW, Bonds DE, Burke GL, Goff DC Jr. Heart failure prevalence, incidence and mortality in the elderly with diabetes. *Diabetes Care* 2004;**27**:699–703.
  23. Murcia AM, Hennekens CH, Lamas GA, Jimenez-Navarro M, Rouleau JL, Flaker GC, Goldman S, Skali H, Braunwald E, Pfeffer MA. Impact of diabetes on mortality in patients with myocardial infarction and left ventricular dysfunction. *Arch Intern Med* 2004;**164**:2273–2279.
  24. Held C, Gerstein HC, Yusuf S, Zhao F, Hilbrich L, Anderson C, Sleight P, Teo K, for the ONTARGET/TRANSCEND investigators. Glucose levels predict hospitalization for congestive heart failure in patients at high cardiovascular risk. *Circulation* 2007;**115**:1371–1375.
  25. MacDonald MR, Jhund PS, Petrie MC, Lewsey JD, Hawkins NM, Bhagra S, Munoz N, Varyani F, Redpath A, Chalmers J, MacIntyre K, McMurray JJ. Discordant short- and long-term outcomes associated with diabetes in patients with heart failure: importance of age and sex: a population study of 5.1 million people in Scotland. *Circ Heart Fail* 2008;**1**:234–241.
  26. MacDonald MR, Petrie MC, Varyani F, Ostergren J, Michelson EL, Young JB, Solomon SD, Granger CB, Swedberg K, Yusuf S, Pfeffer MA, McMurray JJ, CHARM Investigators. Impact of diabetes on outcomes in patients with low and preserved ejection fraction heart failure: an analysis of the Candesartan in Heart failure: Assessment of Reduction in Mortality and morbidity (CHARM) programme. *Eur Heart J* 2008;**29**:1377–1385.
  27. Dei Cas A, Spigoni V, Ridolfi V, Metra M. Diabetes and chronic heart failure: from diabetic cardiomyopathy to therapeutic approach. *Endocr Metab Immune Disord Drug Targets* 2013;**13**:38–50.
  28. Iribarren C, Karter AJ, Go AS, Ferrara A, Liu JY, Sidney S, Selby JV. Glycemic control and heart failure among adult patients with diabetes. *Circulation* 2001;**103**:2668–2673.
  29. McMurray JJ, Gerstein HC, Holman RR, Pfeffer MA. Heart failure: a cardiovascular outcome in diabetes that can no longer be ignored. *Lancet Diabetes Endocrinol* 2014;**2**:843–851.
  30. van Heerebeek L, Borbely A, Niessen HW, Bronzwaer JGF, van der Velden J, Stienen GJ, Linke WA, Laarman GJ, Paulus WJ. Myocardial structure and function differ in systolic and diastolic heart failure. *Circulation* 2006;**113**:1966–1973.
  31. Poornima IG, Parikh P, Shannon RP. Diabetic cardiomyopathy: the search for a unifying hypothesis. *Circ Res* 2006;**98**:596–605.
  32. Nishikawa T, Edelstein D, Du XL, Yamagishi S, Matsumura T, Kaneda Y, Yorek MA, Beebe D, Oates PJ, Hammes HP, Giardino I, Brownlee M. Normalizing mitochondrial superoxide production blocks three pathways of hyperglycaemic damage. *Nature* 2000;**404**:787–790.
  33. Shenouda SM, Widlansky ME, Chen K, Xu G, Holbrook M, Tabit CE, Hamburg NM, Frame AA, Caiano TL, Kluge MA, Duess MA, Levit A, Kim B, Hartman ML, Joseph L, Shirihai OS, Vita JA. Altered mitochondrial dynamics contributes to endothelial dysfunction in diabetes mellitus. *Circulation* 2011;**124**:444–453.
  34. Tang X, Luo YX, Chen HZ, Liu DP. Mitochondria, endothelial cell function, and vascular diseases. *Front Physiol* 2014;**5**:175.
  35. van Heerebeek L, Hamdani N, Falcao-Pires I, Leite-Moreira AF, Begieneman MP, Bronzwaer JG, van der Velden J, Stienen GJ, Laarman GJ, Somsen A, Verheugt FW, Niessen HW, Paulus WJ. Low myocardial protein kinase G activity in heart failure with preserved ejection fraction. *Circulation* 2012;**126**:830–839.
  36. Hamdani N, Bishu KG, Frieling-Salewski M, Redfield MM, Linke WA. Deranged myofilament phosphorylation and function in experimental heart failure with preserved ejection fraction. *Cardiovasc Res* 2013;**97**:464–471.
  37. Hamdani N, Franssen C, Lourenço A, Falcão-Pires I, Fontoura D, Leite S, Plettig L, López B, Ottenheijm CA, Becher PM, González A, Tschöpe C, Díez J, Linke WA, Leite-Moreira AF, Paulus WJ. Myocardial titin hypophosphorylation importantly contributes to heart failure with preserved ejection fraction in a rat metabolic risk model. *Circ Heart Fail* 2013;**6**:1239–1249.
  38. Falcao-Pires I, Hamdani N, Borbely A, Gavina C, Schalkwijk CG, van der Velden J, van Heerebeek L, Stienen GJM, Niessen HWM, Leite-Moreira AF, Paulus WJ. Diabetes worsens diastolic left ventricular dysfunction in aortic stenosis through altered myocardial structure and cardiomyocyte stiffness. *Circulation* 2011;**124**:1151–1159.
  39. Mouton S, Marechal X, Coisne A, Debry N, Modine T, Fayad G, Potelle C, El Arid JM, Mouton S, Sebti Y, Duez H, Preau S, Remy-Jouet I, Zerimech F, Koussa M, Richard V, Neviere R, Edme JL, Lefebvre P, Staels B. Myocardial contractile dysfunction is associated with impaired mitochondrial function and dynamics in type 2 diabetic but not in obese patients. *Circulation* 2014;**130**:554–564.
  40. Asburn J, Villareal FJ. The pathogenesis of myocardial fibrosis in the setting of diabetic cardiomyopathy. *J Am Coll Cardiol* 2006;**47**:693–700.
  41. McGavock JM, Victor RG, Unger RH, Szczepaniak LS. Adiposity of the heart, revisited. *Ann Intern Med* 2006;**144**:517–524.
  42. Boudina S, Abel ED. Diabetic cardiomyopathy revisited. *Circulation* 2007;**115**:3213–3223.
  43. Harnancey R, Taegtmeier H. The complexities of diabetic cardiomyopathy: lessons from patients and animal models. *Curr Diab Rep* 2008;**8**:243–248.
  44. Symons JD, Abel ED. Lipotoxicity contributes to endothelial dysfunction: a focus on the contribution from ceramide. *Rev Endocr Metab Disord* 2013;**14**:59–68.
  45. Bayeva M, Sawicki KT, Ardehali H. Taking diabetes to heart – deregulation of myocardial lipid metabolism in diabetic cardiomyopathy. *J Am Heart Assoc* 2013;**2**:e000433.
  46. Randle PJ, Garland PB, Hales CN, Newsholme EA. The glucose fatty-acid cycle. Its role in insulin sensitivity and the metabolic disturbances of diabetes mellitus. *Lancet* 1963;**1**:785–789.
  47. Herrero P, Peterson LR, McGill JB, Matthew S, Lesniak D, Dence C, Gropler RJ. Increased myocardial fatty acid metabolism in patients with type 1 diabetes mellitus. *J Am Coll Cardiol* 2006;**47**:598–604.
  48. Rijzewijk LJ, van der Meer RW, Lamb HJ, de Jong HW, Lubberink M, Romijn JA, Bax JJ, de Roos A, Twisk JW, Heine RJ, Lammertsma AA, Smit JW, Diamant M. Altered myocardial substrate metabolism and decreased diastolic function in non-ischemic human diabetic cardiomyopathy: studies with cardiac positron emission tomography and magnetic resonance imaging. *J Am Coll Cardiol* 2009;**54**:1524–1532.
  49. González A, Ravassa S, Beaumont J, López B, Díez J. New targets to treat the structural remodeling of the myocardium. *J Am Coll Cardiol* 2011;**58**:1833–1843.
  50. McGavock JM, Lingvay I, Zib I, Tillery T, Salas N, Unger R, Levine BD, Raskin P, Victor RG, Szczepaniak LS. Cardiac steatosis in diabetes mellitus: a 1H-magnetic resonance spectroscopy study. *Circulation* 2007;**116**:1170–1175.
  51. Rijzewijk LJ, van der Meer RW, Smit JW, Diamant M, Bax JJ, Hammer S, Romijn JA, de Roos A, Lamb HJ. Myocardial steatosis is an independent predictor of diastolic dysfunction in type 2 diabetes mellitus. *J Am Coll Cardiol* 2008;**52**:1793–1799.
  52. Perry DK, Hannun YA. The role of ceramide in cell signalling. *Biochem Biophys Acta* 1998;**1436**:233–243.
  53. Zhang L, Ussher JR, Oka T, Cadete VJ, Wagg C, Lopaschuk GD. Cardiac diacylglycerol accumulation in high fat-fed mice is associated with impaired insulin-stimulated glucose oxidation. *Cardiovasc Res* 2011;**89**:148–156.
  54. Baidoshvili A, Krijnen PAJ, Kupreishvili K, Ciurana C, Bleeker W, Nijmeijer R, Visser CA, Visser FC, Meijer CJLM, Stooker W, Eijnsman L, Van Hinsbergh VWM, Hack CE, Niessen HWM, Schalkwijk CG. N<sup>ε</sup>-(Carboxymethyl)lysine depositions in intramyocardial arteries in human acute myocardial infarction. A predictor or reflection of infarction? *Arterioscl Thromb Vasc Biol* 2006;**26**:2497–2503.

55. Anderson MM, Requena JR, Crowley JR, Thorpe SR, Heinecke JW. The myeloperoxidase system of human phagocytes generates N-epsilon-(carboxymethyl)lysine on proteins: a mechanism for producing advanced glycation end products at sites of inflammation. *J Clin Invest* 1999;**104**:103–113.
56. Ziemann SJ, Melenovsky V, Clattenburg L, Corretti MC, Capriotti A, Gerstenblith G, Kass DA. Advanced glycation endproduct crosslink breaker (alagebrium) improves endothelial function in patients with isolated systolic hypertension. *J Hypertens* 2007;**25**:577–583.
57. Donaldson C, Taatjes DJ, Zile M, Palmer B, VanBuren P, Spinale F, Maughan D, Von Turkovich M, Bishop N, LeWinter MM. Combined immunoelectron microscopic and computer-assisted image analyses to detect advanced glycation end-products in human myocardium. *Histochem Cell Biol* 2010;**134**:23–30.
58. Zhang M, Kho AL, Anilkumar N, Chibber R, Pagano PJ, Shah AM, Cave AC. Glycated proteins stimulate reactive oxygen species production in cardiac myocytes: involvement of Nox2 (gp91phox)-containing NADPH oxidase. *Circulation* 2006;**113**:1235–1243.
59. Little WC, Zile MR, Kitzman DW, Hundley WG, O'Brien TX, Degroff RC. The effect of alagebrium chloride (ALT-711), a novel glucose cross-link breaker, in the treatment of elderly patients with diastolic heart failure. *J Card Fail* 2005;**11**:191–195.
60. Hartog JW, Willemsen S, van Veldhuisen DJ, Posma JL, van Wijk LM, Hummel YM, Hillege HL, Voors AA, for the BENEFICIAL investigators. Effects of alagebrium, an advanced glycation endproduct breaker, on exercise tolerance and cardiac function in patients with chronic heart failure. *Eur J Heart Fail* 2011;**13**:899–908.
61. Camici PG, Crea F. Coronary microvascular dysfunction. *N Engl J Med* 2007;**356**:830–840.
62. Gottumukkala RV, Lv H, Cornivelli L, Wagers AJ, Kwong RY, Bronson R, Stewart GC, Schulze PC, Chutkow W, Wolpert HA, Lee RT, Lipes MA. Myocardial infarction triggers chronic cardiac autoimmunity in type 1 diabetes. *Sci Transl Med* 2012;**4**:138ra80.
63. Selvin E, Lazo M, Chen Y, Shen L, Rubin J, McEnvoy JW, Hoogeveen RC, Sharrett AR, Ballantyne CM, Coresh J. Diabetes mellitus, prediabetes and incidence of subclinical myocardial damage. *Circulation* 2014;**130**:1374–1382.
64. Young ME, McNulty P, Taegtmeier H. Adaptation and maladaptation of the heart in diabetes: part II: potential mechanisms. *Circulation* 2002;**105**:1861–1870.
65. Witteles RM, Fowler MB. Insulin-resistant cardiomyopathy clinical evidence, mechanisms, and treatment options. *J Am Coll Cardiol* 2008;**51**:93–102.
66. Winkler G, Lakatos P, Salamon F, Nagy Z, Speer G, Kovacs M, Harnos G, Dworak O, Cseh K. Elevated serum TNF-alpha level as a link between endothelial dysfunction and insulin resistance in normotensive obese patients. *Diabet Med* 1999;**16**:207–211.
67. Lukic L, Lalic NM, Rajkovic N, Jotic A, Lalic K, Milicic T, Seferovic JP, Macesic M, Gajovic JS. Hypertension in obese type 2 diabetes patients is associated with increases in insulin resistance and IL-6 cytokine levels: potential targets for an efficient preventive intervention. *Int J Environ Res Public Health* 2014;**11**:3586–3598.
68. Murray AJ, Anderson RE, Watson GC, Radda GK, Clarke K. Uncoupling proteins in human heart. *Lancet* 2004;**364**:1786–1888.
69. Boudina S, Abel ED. Mitochondrial uncoupling: a key contributor to reduced cardiac efficiency in diabetes. *Physiology* 2006;**21**:250–258.
70. Rider OJ, Francis JM, Ali MK, Holloway C, Pegg T, Robson MD, Tyler D, Byrne J, Clarke K, Neubauer S. Effects of catecholamine stress on diastolic function and myocardial energetics in obesity. *Circulation* 2012;**125**:1511–1519.
71. Diamant M, Lamb HJ, Groeneveld Y, Endert EL, Smit JW, Bax JJ, Romijn JA, de Roos A, Radder JK. Diastolic dysfunction is associated with altered myocardial metabolism in asymptomatic normotensive patients with well-controlled type 2 diabetes mellitus. *J Am Coll Cardiol* 2003;**42**:328–335.
72. Phan TT, Abozguia K, Nallur Shivu G, Mahadevan G, Ahmed I, Williams L, Dwivedi G, Patel K, Steendijk P, Ashrafian H, Henning A, Frenneaux M. Heart failure with preserved ejection fraction is characterized by dynamic impairment of active relaxation and contraction of the left ventricle on exercise and associated with myocardial energy deficiency. *J Am Coll Cardiol* 2009;**54**:402–409.
73. Lawlor MA, Alessi DR. PKB/Akt: a key mediator of cell proliferation, survival and insulin responses? *J Cell Sci* 2001;**114**:2903–2910.
74. Krüger M, Babicz K, von Frieling-Salewsky M, Linke WA. Insulin signaling regulates cardiac titin properties in heart development and diabetic cardiomyopathy. *J Mol Cell Cardiol* 2010;**48**:910–916.
75. Schnell O, Kirsch CM, Stemplinger J, Haslbeck M, Standl E. Scintigraphic evidence for cardiac sympathetic dysinnervation in long-term IDDM patients with and without ECG-based autonomic neuropathy. *Diabetologia* 1995;**38**:1345–1352.
76. Schnell O, Muhr D, Weiss M, Dresel S, Haslbeck M, Standl E. Reduced myocardial 123I-metaiodobenzylguanidine uptake in newly diagnosed IDDM patients. *Diabetes* 1996;**45**:801–805.
77. Cooper LT, Baughman KL, Feldman AM, Frustaci A, Jessup M, Kuhl U, Levine GN, Narula J, Starling RC, Towbin J, Virmani R, American Heart Association, American College of Cardiology, European Society of Cardiology. The role of endomyocardial biopsy in the management of cardiovascular disease: a scientific statement from the American Heart Association, the American College of Cardiology, and the European Society of Cardiology. *Circulation* 2007;**116**:2216–2233.
78. Stritzke J, Markus MR, Duderstadt S, Lieb W, Luchner A, Döring A, Keil U, Hense HW, Schunkert H, MONICA/KORA Investigators. The aging process of the heart: obesity is the main risk factor for left atrial enlargement during aging the MONICA/KORA (monitoring of trends and determinations in cardiovascular disease/cooperative research in the region of Augsburg) study. *J Am Coll Cardiol* 2009;**54**:1982–1989.
79. Takeda Y, Sakata Y, Mano T, Ohtani T, Kamimura D, Tamaki S, Omori Y, Tsukamoto Y, Aizawa Y, Komuro I, Yamamoto K. Competing risks of heart failure with preserved ejection fraction in diabetic patients. *Eur J Heart Fail* 2011;**13**:664–669.
80. Borlaug BA, Redfield MM, Melenovsky V, Kane GC, Karon BL, Jacobsen SJ, Rodeheffer RJ. Longitudinal changes in left ventricular stiffness: a community-based study. *Circ Heart Fail* 2013;**6**:944–952.
81. Mikkelsen KV, Møller JE, Bie P, Ryde H, Videbaek L, Haghfelt T. Tei index and neurohormonal activation in patients with incident heart failure: serial changes and prognostic value. *Eur J Heart Fail* 2006;**8**:599–608.
82. Mottram PM, Leano R, Marwick TH. Usefulness of B-type natriuretic peptide in hypertensive patients with exertional dyspnea and normal left ventricular ejection fraction and correlation with new echocardiographic indexes of systolic and diastolic function. *Am J Cardiol* 2003;**92**:1434–1438.
83. Stahrenberg R, Edelmann F, Mende M, Kocksämper A, Dungen HD, Lüers C, Binder L, Herrmann-Lingen C, Gelbrich G, Hasenfuss G, Pieske B, Wachter R. The novel biomarker growth differentiation factor 15 in heart failure with normal ejection fraction. *Eur J Heart Fail* 2010;**12**:1309–1316.
84. Shuai XX, Chen YY, Lu YX, Su GH, Wang YH, Zhao HL, Han J. Diagnosis of heart failure with preserved ejection fraction: which parameters and diagnostic strategies are more valuable? *Eur J Heart Fail* 2011;**13**:737–741.
85. Suskin N, McKelvie RS, Burns RJ, Latini R, Pericak D, Probstfield J, Rouleau JL, Sigouin C, Solymoss CB, Tsuyuki R, White M, Yusuf S. Glucose and insulin abnormalities relate to functional capacity in patients with congestive heart failure. *Eur Heart J* 2000;**21**:1368–1375.
86. Authors/Task Force Members, Rydén L, Grant PJ, Anker SD, Berne C, Cosentino F, Danchin N, Deaton C, Escaned J, Hammes HP, Huikuri H, Marre M, Marx N, Mellbin L, Ostergren J, Patrono C, Seferovic P, Uva MS, Taskinen MR, Tendera M, Tuomilehto J, Valensi P, Zamorano JL, ESC Committee for Practice Guidelines (CPG), Zamorano JL, Achenbach S, Baumgartner H, Bax JJ, Bueno H, Dean V, Deaton C, Erol C, Fagard R, Ferrari R, Hasdai D, Hoes AW, Kirchhof P, Knuuti J, Kolh P, Lancellotti P, Linhart A, Nihoyannopoulos P, Piepoli MF, Ponikowski P, Sirnes PA, Tamargo JL, Tendera M, Torbicki A, Wijns W, Windecker S, Document Reviewers, De Backer G, Sirnes PA, Ezquerro EA, Avogaro A, Badimon L, Baranova E, Baumgartner H, Betteridge J, Ceriello A, Fagard R, Funck-Brentano C, Gulba DC, Hasdai D, Hoes AW, Kjekshus JK, Knuuti J, Kolh P, Lev E, Mueller C, Neyses L, Nilsson PM, Perk J, Ponikowski P, Reiner Z, Sattar N, Schächinger V, Scheen A, Schirmer H, Strömberg A, Sudzhaeva S, Tamargo JL, Viigimaa M, Vlachopoulos C, Xuerreb RG. ESC Guidelines on diabetes, pre-diabetes, and cardiovascular diseases developed in collaboration with the EASD: the Task Force on diabetes, pre-diabetes, and cardiovascular diseases of the European Society of Cardiology (ESC) and developed in collaboration with the European Association for the Study of Diabetes (EASD). *Eur Heart J* 2013;**34**:3035–3087.
87. Franssen C, Paulus WJ. The future diagnosis of heart failure with normal ejection fraction: less imaging, more biomarkers? *Eur J Heart Fail* 2011;**13**:1043–1045.
88. Martos R, Baugh J, Ledwidge M, O'Loughlin C, Murphy NF, Conlon C, Patle A, Donnelly SC, McDonald K. Diagnosis of heart failure with preserved ejection fraction: improved accuracy with the use of markers of collagen turnover. *Eur J Heart Fail* 2009;**11**:191–197.
89. González A, López B, Querejeta R, Zubillaga E, Echeverría T, Díez J. Filling pressures and collagen metabolism in hypertensive patients with heart failure and normal ejection fraction. *Hypertension* 2010;**55**:1418–1424.
90. Collier P, Watson CJ, Voon V, Phelan D, Jan A, Mak G, Martos R, Baugh JA, Ledwidge MT, McDonald KM. Can emerging biomarkers of myocardial remodelling identify asymptomatic hypertensive patients at risk for diastolic dysfunction and diastolic heart failure? *Eur J Heart Fail* 2011;**13**:1087–1095.
91. Cleland JG, Tendera M, Adamus J, Freemantle N, Polonski L, Taylor J. The perindopril in elderly people with chronic heart failure (PEP-CHF) study. *Eur Heart J* 2006;**27**:2338–2345.
92. Massie BM, Carson PE, McMurray JJ, Komajda M, McKelvie R, Zile MR, Anderson S, Donovan M, Iverson E, Staiger C, Ptaszynska A, I-PRESERVE Investigators. Irbesartan in patients with heart failure and preserved ejection fraction. *N Engl J Med* 2008;**359**:2456–2467.
93. Pitt B, Pfeffer MA, Assmann SF, Boineau R, Anand IS, Claggett B, Clausell N, Desai AS, Diaz R, Fleg JL, Gordeev I, Harty B, Heitner JF, Kenwood CT, Lewis EF,

- O'Meara E, Probstfield JL, Shaburishvili T, Shah SJ, Solomon SD, Sweitzer NK, Yang S, McKinlay SM, TOPCAT Investigators. Spironolactone for heart failure with preserved ejection fraction. *N Engl J Med* 2014;**370**:1383–1392.
94. McMurray JJ, Adamopoulos S, Anker SD, Auricchio A, Böhm M, Dickstein K, Falk V, Filippatos G, Fonseca C, Gomez-Sanchez MA, Jaarsma T, Køber L, Lip GY, Maggioni AP, Parkhomenko A, Pieske BM, Popescu BA, Rønnevik PK, Rutten FH, Schwitzer J, Seferovic P, Stepińska J, Trindade PT, Voors AA, Zannad F, Zeiher A, Task Force for the Diagnosis and Treatment of Acute and Chronic Heart Failure 2012 of the European Society of Cardiology, Bax JJ, Baumgartner H, Ceconi C, Dean V, Deaton C, Fagard R, Funck-Brentano C, Hasdai D, Hoes A, Kirchhof P, Knuuti J, Kolh P, McDonagh T, Moulin C, Popescu BA, Reiner Z, Sechtem U, Sirnes PA, Tendera M, Torbicki A, Vahanian A, Windecker S, McDonagh T, Sechtem U, Bonet LA, Avraamides P, Ben Lamin HA, Brignole M, Coca A, Cowburn P, Dargie H, Elliott P, Flachskampf FA, Guida GF, Hardman S, Iung B, Merkley B, Mueller C, Nanas JN, Nielsen OW, Orn S, Parissis JT, Ponikowski P, ESC Committee for Practice Guidelines. ESC guidelines for the diagnosis and treatment of acute and chronic heart failure 2012: The Task Force for the Diagnosis and Treatment of Acute and Chronic Heart Failure 2012 of the European Society of Cardiology. Developed in collaboration with the Heart Failure Association (HFA) of the ESC. *Eur J Heart Fail* 2012;**14**:803–869.
  95. Farasat SM, Bolger DT, Shetty V, Menachery EP, Gerstenblith G, Kasper EK, Najjar SS. Effect of beta-blocker therapy on rehospitalization rates in women versus men with heart failure and preserved ejection fraction. *Am J Cardiol* 2010;**105**:229–234.
  96. Peterson LR, Saeed IM, McGill JB, Herrero P, Schechtman KB, Gunawardena R, Recklein CL, Coggan AR, Demoss AJ, Dence CS, Groppler RJ. Sex and type 2 diabetes: obesity-independent effects on left ventricular substrate metabolism and relaxation in humans. *Obesity* 2012;**20**:802–810.
  97. Hammer S, Snel M, Lamb HJ, Jazet IM, van der Meer RW, Pijl H, Meinders EA, Romijn JA, de Roos A, Smit JW. Prolonged caloric restriction in obese patients with type 2 diabetes mellitus decreases myocardial triglyceride content and improves myocardial function. *J Am Coll Cardiol* 2008;**52**:1006–1012.
  98. Schrauwen-Hinderling VB, Hesselink MK, Meex R, van der Made S, Schär M, Lamb H, Wildberger JE, Glatz J, Snoep G, Kooi ME, Schrauwen P. Improved ejection fraction after exercise training in obesity is accompanied by reduced cardiac lipid content. *J Clin Endocrinol Metab* 2010;**95**:1932–1938.
  99. Schrauwen-Hinderling VB, Meex RC, Hesselink MK, van de Weijer T, Leiner T, Schär M, Lamb HJ, Wildberger JE, Glatz JF, Schrauwen P, Kooi ME. Cardiac lipid content is unresponsive to a physical activity training intervention in type 2 diabetic patients, despite improved ejection fraction. *Cardiovasc Diabetol* 2011;**10**:47.
  100. Rijzewijk LJ, Diamant M. Diabetic gluco-lipotoxic cardiomyopathy – amendable by metabolic manipulation? *Eur Endocrinol*, 6th Edition, 2008;**4**:54–61.
  101. Tuunanen H, Engblom E, Naum A, Nägren K, Hesse B, Airaksinen KE, Nuutila P, Iozzo P, Ukkonen H, Opie LH, Knuuti J. Free fatty acid depletion acutely decreases cardiac work and efficiency in cardiomyopathic heart failure. *Circulation* 2006;**114**:2130–2137.
  102. Hare JL, Hordern MD, Leano R, Stanton T, Prins JB, Marwick TH. Application of an exercise intervention on the evolution of diastolic dysfunction in patients with diabetes mellitus: efficacy and effectiveness. *Circ Heart Fail* 2011;**4**:441–449.
  103. Kitzman DW, Brubaker PH, Morgan TM, Stewart KP, Little WC. Exercise training in older patients with heart failure and preserved ejection fraction: a randomized, controlled, single-blind trial. *Circ Heart Fail* 2010;**3**:659–667.
  104. Edelmann F, Gelbrich G, Dungen HD, Fröhling S, Wachter R, Stahrenberg R, Binder L, Töpper A, Lashki DJ, Schwarz S, Herrmann-Lingen C, Löffler M, Hasenfuss G, Halle M, Pieske B. Exercise training improves exercise capacity and diastolic function in patients with heart failure with preserved ejection fraction: results of the Ex-DHF (Exercise training in Diastolic Heart Failure) pilot study. *J Am Coll Cardiol* 2011;**58**:1780–1791.
  105. Eurich DT, Weir DL, Majumdar SR, Tsuyuki RT, Johnson JA, Tjosvold L, Vanderloo SE, McAlister FA. Comparative safety and effectiveness of metformin in patients with diabetes mellitus and heart failure: systematic review of observational studies involving 34,000 patients. *Circ Heart Fail* 2013;**6**:395–402.
  106. Van der Meer RW, Rijzewijk LJ, de Jong HWAM, Lamb HJ, Mark Lubberink M, Romijn JA, Bax JJ, de Roos A, Kamp O, Paulus WJ, Heine RJ, Lammertsma AA, Smit JWA, Diamant M. Pioglitazone improves cardiac function and alters myocardial substrate metabolism without affecting cardiac triglyceride accumulation and high-energy phosphate metabolism in patients with well-controlled type 2 diabetes mellitus. *Circulation* 2009;**119**:2069–2077.
  107. Chen WJ, Rijzewijk LJ, van der Meer RW, Heymans MW, van Duinkerken E, Lubberink M, Lammertsma AA, Lamb HJ, de Roos A, Romijn JA, Smit JW, Bax JJ, Bjerre M, Frystyk J, Flyvbjerg A, Diamant M. Association of plasma osteoprotegerin and adiponectin with arterial function, cardiac function and metabolism in asymptomatic type 2 diabetic men. *Cardiovasc Diabetol* 2011;**10**:67.
  108. Lago RM, Singh PP, Nesto RW. Congestive heart failure and cardiovascular death in patients with prediabetes and type 2 diabetes given thiazolidinediones: a meta-analysis of randomised clinical trials. *Lancet* 2007;**370**:1129–1136.
  109. von Bibra H, Hansen A, Dounis V, Bystedt T, Malmberg K, Ryden L. Augmented metabolic control improves myocardial diastolic function and perfusion in patients with non-insulin dependent diabetes. *Heart* 2004;**90**:1483–1484.
  110. Jarnert C, Landstedt-Hallin L, Malmberg K, Melcher A, Ohrvik J, Persson H, Ryden L. A randomised trial of the impact of strict glycaemic control on myocardial diastolic function and perfusion reserve. A report from the DADD (diabetes mellitus and diastolic dysfunction) study. *Eur J Heart Failure* 2009;**11**:39–47.
  111. Scirica BM, Bhatt DL, Braunwald E, Steg PG, Davidson J, Hirshberg B, Ohman P, Frederich R, Wiviott SD, Hoffman EB, Cavender MA, Udell JA, Desai NR, Mosenzoon O, McGuire DK, Ray KK, Leiter LA, Raz I, SAVOR-TIMI 53 Steering Committee and Investigators. Saxagliptin and cardiovascular outcomes in patients with type 2 diabetes mellitus. *N Engl J Med* 2013;**369**:1317–1326.
  112. Weir DL, McAlister FA, Senthilselvan A, Minhas-Sandu JK, Eurich DT. Sitagliptin use in patients with diabetes and heart failure: a population based retrospective cohort study. *J Am Coll Cardiol HF* 2014;**2**:573–582.
  113. Bhatt DL, Cavender MA. Do dipeptidyl peptidase-4 inhibitors increase the risk of heart failure? *J Am Coll Cardiol HF* 2014;**2**:583–585.
  114. Folmes CD, Clanachan AS, Lopaschuk GD. Fatty acids attenuate insulin regulation of 5'-AMP-activated protein kinase and insulin cardioprotection after ischemia. *Circ Res* 2006;**99**:61–68.
  115. Kötter S, Unger A, Hamdani N, Lang P, Vorgerd M, Nagel-Steger L, Linke WA. Human myocytes are protected from titin aggregation-induced stiffening by small heat shock proteins. *J Cell Biol* 2014;**204**:187–202.
  116. Munaf M, Pellicori P, Allgar V, Wong K. A meta-analysis of the therapeutic effects of glucagon-like peptide-1 agonist in heart failure. *Int J Pept* 2012;**2012**:249827.
  117. Tahrani AA, Barnett AH, Bailey CJ. SGLT inhibitors in management of diabetes. *Lancet Diabetes Endocrinol* 2013;**1**:140–151.
  118. Maisch B, Richter A, Koelsch S, Alter P, Funck R, Pankuweit S. Management of patients with suspected (peri-) myocarditis and inflammatory dilated cardiomyopathy. *Herz* 2006;**31**:881–890.
  119. Shekelle PG, Rich MW, Morton SC, Atkinson CS, Tu W, Maglione M, Rhodes S, Barrett M, Fonarow GC, Greenberg B, Heidenreich PA, Knabel T, Konstam MA, Steimle A, Warner Stevenson L. Efficacy of angiotensin-converting enzyme inhibitors and beta-blockers in the management of left ventricular systolic dysfunction according to race, gender, and diabetic status: a meta-analysis of major clinical trials. *J Am Coll Cardiol* 2003;**41**:1529–1538.
  120. Martin DT, McNitt S, Nesto RW, Rutter MK, Moss AJ. Cardiac resynchronization therapy reduces the risk of cardiac events in patients with diabetes enrolled in the multicenter automatic defibrillator implantation trial with cardiac resynchronization therapy (MADIT-CRT). *Circ Heart Fail* 2011;**4**:332–338.
  121. Smooke S, Horwich TB, Fonarow GC. Insulin-treated diabetes is associated with a marked increase in mortality in patients with advanced heart failure. *Am Heart J* 2005;**149**:168.
  122. Lexis CP, van der Horst IC, Lipsic E, Wieringa WG, de Boer RA, van den Heuvel AF, van der Werf HW, Schurer RA, Pundziute G, Tan ES, Nieuwland W, Willemsen HM, Dorhout B, Molmans BH, van der Horst-Schrivers AN, Wolffenbuttel BH, ter Horst GJ, van Rossum AC, Tijssen JG, Hillege HL, de Smet BJ, van der Harst P, van Veldhuisen DJ, GIPS-III Investigators. Effect of metformin on left ventricular function after acute myocardial infarction in patients without diabetes: the GIPS-III randomized clinical trial. *JAMA* 2014;**311**:1526–1535.
  123. Read PA, Khan FZ, Heck PM, Hoole SP, Dutka DP. DPP-4 inhibition by sitagliptin improves the myocardial response to dobutamine stress and mitigates stunning in a pilot study of patients with coronary artery disease. *Circ Cardiovasc Imaging* 2010;**3**:195–201.
